# Supplementary material for: Untangling Empowerment and Contraceptive Use Longitudinally in Five African Settings
Source: bioRxiv or medRxiv preprint supplement (doi:10.1101/2024.10.30.24316433), 2024-11-02
Supplement: Supplementary file [file media-1.pdf]

| Country | Empowerm    | Coefficient        | Estimate | SE    |
|---------|-------------|--------------------|----------|-------|
| Kenya   | Paid work   | $vEM3$             | 0.228    | 0.013 |
| Kenya   | Paid work   | $\beta EM,2,1$     | 0.53     | 0.016 |
| Kenya   | Paid work   | $\lambda EM,2,1$   | 0.05     | 0.012 |
| Kenya   | Paid work   | $\lambda EM,2,1$   | 0.018    | 0.017 |
| Kenya   | Paid work   | $vEM2$             | 0.251    | 0.012 |
| Kenya   | Paid work   | $\beta EM,1,0$     | 0.548    | 0.015 |
| Kenya   | Paid work   | $\lambda EM,1,0$   | 0.044    | 0.015 |
| Kenya   | Paid work   | $vCT1$             | 0.162    | 0.038 |
| Kenya   | Paid work   | $\theta CT,age$    | -0.001   | 0.001 |
| Kenya   | Paid work   | $\theta CT,marria$ | 0.336    | 0.022 |
| Kenya   | Paid work   | $\theta CT,highes$ | 0.038    | 0.008 |
| Kenya   | Paid work   | $\theta CT,births$ | 0.031    | 0.006 |
| Kenya   | Paid work   | $\theta CT,urban$  | 0.101    | 0.024 |
| Kenya   | Paid work   | $vEM3$             | 0.254    | 0.016 |
| Kenya   | Paid work   | $\lambda EM,2,1$   | 0.139    | 0.018 |
| Kenya   | Paid work   | $\beta EM,2,1$     | 0.436    | 0.019 |
| Kenya   | Paid work   | $\lambda EM,2,1$   | 0.02     | 0.019 |
| Kenya   | Paid work   | $vEM2$             | 0.342    | 0.017 |
| Kenya   | Paid work   | $\lambda EM,1,0$   | 0.102    | 0.017 |
| Kenya   | Paid work   | $\beta EM,1,0$     | 0.38     | 0.019 |
| Kenya   | Paid work   | $vEM1$             | -0.085   | 0.04  |
| Kenya   | Paid work   | $\theta EM,age$    | 0.013    | 0.001 |
| Kenya   | Paid work   | $\theta EM,marria$ | 0.033    | 0.026 |
| Kenya   | Paid work   | $\theta EM,highes$ | 0.026    | 0.009 |
| Kenya   | Paid work   | $\theta EM,births$ | -0.003   | 0.006 |
| Kenya   | Paid work   | $\theta EM,urban$  | 0.166    | 0.032 |
| Kenya   | Paid work   | $cov,CT3,EM$       | 0.014    | 0.003 |
| Kenya   | Paid work   | $cov,CT2,EM$       | 0.012    | 0.003 |
| Kenya   | Paid work   | $cov,CT1,EM$       | 0.022    | 0.004 |
| Kenya   | Paid work   | $\varepsilon,EM3$  | 0.174    | 0.004 |
| Kenya   | Paid work   | $\varepsilon,EM2$  | 0.17     | 0.004 |
| Kenya   | Paid work   | $\varepsilon,CT1$  | 0.21     | 0.004 |
| Kenya   | Paid work   | $\varepsilon,EM3$  | 0.185    | 0.004 |
| Kenya   | Paid work   | $\varepsilon,EM2$  | 0.206    | 0.004 |
| Kenya   | Paid work   | $\varepsilon,EM1$  | 0.221    | 0.003 |
| Kenya   | Decision at | $vEM3$             | 0.343    | 0.024 |
| Kenya   | Decision at | $\beta EM,2,1$     | 0.466    | 0.022 |
| Kenya   | Decision at | $\lambda EM,2,1$   | -0.015   | 0.021 |
| Kenya   | Decision at | $\lambda EM,2,1$   | 0.031    | 0.019 |
| Kenya   | Decision at | $vEM2$             | 0.375    | 0.023 |
| Kenya   | Decision at | $\beta EM,1,0$     | 0.476    | 0.021 |
| Kenya   | Decision at | $\lambda EM,1,0$   | -0.017   | 0.019 |

|       |                                |        |       |
|-------|--------------------------------|--------|-------|
| Kenya | Decision at $vCT1$             | 0.766  | 0.064 |
| Kenya | Decision at $\theta CT,age$    | -0.009 | 0.002 |
| Kenya | Decision at $\theta CT,marria$ | 0.021  | 0.055 |
| Kenya | Decision at $\theta CT,highes$ | 0.049  | 0.009 |
| Kenya | Decision at $\theta CT,births$ | 0.02   | 0.007 |
| Kenya | Decision at $\theta CT,urban$  | 0.09   | 0.025 |
| Kenya | Decision at $vEM3$             | 0.464  | 0.031 |
| Kenya | Decision at $\lambda EM,2,1$   | 0.019  | 0.02  |
| Kenya | Decision at $\beta EM,2,1$     | 0.354  | 0.029 |
| Kenya | Decision at $\lambda EM,2,1$   | -0.02  | 0.021 |
| Kenya | Decision at $vEM2$             | 0.548  | 0.027 |
| Kenya | Decision at $\lambda EM,1,0$   | -0.03  | 0.022 |
| Kenya | Decision at $\beta EM,1,0$     | 0.289  | 0.024 |
| Kenya | Decision at $vEM1$             | 0.388  | 0.075 |
| Kenya | Decision at $\theta EM,age$    | 0.005  | 0.002 |
| Kenya | Decision at $\theta EM,marria$ | 0.128  | 0.064 |
| Kenya | Decision at $\theta EM,highes$ | 0.011  | 0.009 |
| Kenya | Decision at $\theta EM,births$ | 0.001  | 0.006 |
| Kenya | Decision at $\theta EM,urban$  | 0.02   | 0.037 |
| Kenya | Decision at $cov,CT3,EM$       | 0.008  | 0.004 |
| Kenya | Decision at $cov,CT2,EM$       | 0.002  | 0.004 |
| Kenya | Decision at $cov,CT1,EM$       | 0.004  | 0.005 |
| Kenya | Decision at $\varepsilon,EM3$  | 0.174  | 0.005 |
| Kenya | Decision at $\varepsilon,EM2$  | 0.167  | 0.005 |
| Kenya | Decision at $\varepsilon,CT1$  | 0.216  | 0.004 |
| Kenya | Decision at $\varepsilon,EM3$  | 0.176  | 0.008 |
| Kenya | Decision at $\varepsilon,EM2$  | 0.18   | 0.008 |
| Kenya | Decision at $\varepsilon,EM1$  | 0.209  | 0.006 |
| Kenya | Decision at $vEM3$             | 0.34   | 0.033 |
| Kenya | Decision at $\beta EM,2,1$     | 0.466  | 0.022 |
| Kenya | Decision at $\lambda EM,2,1$   | -0.008 | 0.027 |
| Kenya | Decision at $\lambda EM,2,1$   | 0.024  | 0.023 |
| Kenya | Decision at $vEM2$             | 0.363  | 0.024 |
| Kenya | Decision at $\beta EM,1,0$     | 0.477  | 0.021 |
| Kenya | Decision at $\lambda EM,1,0$   | -0.001 | 0.02  |
| Kenya | Decision at $vCT1$             | 0.776  | 0.063 |
| Kenya | Decision at $\theta CT,age$    | -0.009 | 0.002 |
| Kenya | Decision at $\theta CT,marria$ | 0.017  | 0.054 |
| Kenya | Decision at $\theta CT,highes$ | 0.049  | 0.009 |
| Kenya | Decision at $\theta CT,births$ | 0.02   | 0.007 |
| Kenya | Decision at $\theta CT,urban$  | 0.091  | 0.025 |
| Kenya | Decision at $vEM3$             | 0.555  | 0.032 |
| Kenya | Decision at $\lambda EM,2,1$   | 0.031  | 0.019 |
| Kenya | Decision at $\beta EM,2,1$     | 0.327  | 0.033 |

|       |                                  |        |       |
|-------|----------------------------------|--------|-------|
| Kenya | Decision at $\lambda_{EM,2,1}$   | -0.015 | 0.017 |
| Kenya | Decision at $v_{EM2}$            | 0.677  | 0.027 |
| Kenya | Decision at $\lambda_{EM,1,0}$   | -0.01  | 0.019 |
| Kenya | Decision at $\beta_{EM,1,0}$     | 0.213  | 0.026 |
| Kenya | Decision at $v_{EM1}$            | 0.451  | 0.061 |
| Kenya | Decision at $\theta_{EM,age}$    | 0.008  | 0.001 |
| Kenya | Decision at $\theta_{EM,marria$  | 0.115  | 0.058 |
| Kenya | Decision at $\theta_{EM,highe$   | 0.006  | 0.007 |
| Kenya | Decision at $\theta_{EM,births}$ | -0.007 | 0.005 |
| Kenya | Decision at $\theta_{EM,urban}$  | 0.023  | 0.026 |
| Kenya | Decision at $cov,CT3,EM$         | 0.006  | 0.003 |
| Kenya | Decision at $cov,CT2,EM$         | 0.002  | 0.003 |
| Kenya | Decision at $cov,CT1,EM$         | 0      | 0.004 |
| Kenya | Decision at $\varepsilon,EM3$    | 0.174  | 0.005 |
| Kenya | Decision at $\varepsilon,EM2$    | 0.167  | 0.005 |
| Kenya | Decision at $\varepsilon,CT1$    | 0.216  | 0.004 |
| Kenya | Decision at $\varepsilon,EM3$    | 0.12   | 0.008 |
| Kenya | Decision at $\varepsilon,EM2$    | 0.127  | 0.008 |
| Kenya | Decision at $\varepsilon,EM1$    | 0.154  | 0.008 |
| Kenya | Decision at $v_{EM3}$            | 0.236  | 0.015 |
| Kenya | Decision at $\beta_{EM,2,1}$     | 0.515  | 0.019 |
| Kenya | Decision at $\lambda_{EM,2,1}$   | 0.088  | 0.016 |
| Kenya | Decision at $\lambda_{EM,2,1}$   | 0.022  | 0.02  |
| Kenya | Decision at $v_{EM2}$            | 0.259  | 0.013 |
| Kenya | Decision at $\beta_{EM,1,0}$     | 0.555  | 0.017 |
| Kenya | Decision at $\lambda_{EM,1,0}$   | 0.052  | 0.017 |
| Kenya | Decision at $v_{CT1}$            | 0.132  | 0.046 |
| Kenya | Decision at $\theta_{CT,age}$    | -0.002 | 0.002 |
| Kenya | Decision at $\theta_{CT,marria$  | 0.368  | 0.033 |
| Kenya | Decision at $\theta_{CT,highe$   | 0.045  | 0.009 |
| Kenya | Decision at $\theta_{CT,births}$ | 0.031  | 0.007 |
| Kenya | Decision at $\theta_{CT,urban}$  | 0.091  | 0.025 |
| Kenya | Decision at $v_{EM3}$            | 0.159  | 0.017 |
| Kenya | Decision at $\lambda_{EM,2,1}$   | 0.131  | 0.02  |
| Kenya | Decision at $\beta_{EM,2,1}$     | 0.484  | 0.021 |
| Kenya | Decision at $\lambda_{EM,2,1}$   | 0.042  | 0.021 |
| Kenya | Decision at $v_{EM2}$            | 0.232  | 0.017 |
| Kenya | Decision at $\lambda_{EM,1,0}$   | 0.154  | 0.019 |
| Kenya | Decision at $\beta_{EM,1,0}$     | 0.432  | 0.021 |
| Kenya | Decision at $v_{EM1}$            | -0.175 | 0.043 |
| Kenya | Decision at $\theta_{EM,age}$    | 0.008  | 0.002 |
| Kenya | Decision at $\theta_{EM,marria$  | 0.24   | 0.031 |
| Kenya | Decision at $\theta_{EM,highe$   | 0.032  | 0.009 |
| Kenya | Decision at $\theta_{EM,births}$ | 0.004  | 0.007 |

|       |                                  |        |       |
|-------|----------------------------------|--------|-------|
| Kenya | Decision at $\theta_{EM,urban}$  | 0.116  | 0.034 |
| Kenya | Decision at cov,CT3,EM           | 0.012  | 0.004 |
| Kenya | Decision at cov,CT2,EM           | 0.017  | 0.003 |
| Kenya | Decision at cov,CT1,EM           | 0.02   | 0.005 |
| Kenya | Decision at $\varepsilon,EM3$    | 0.169  | 0.005 |
| Kenya | Decision at $\varepsilon,EM2$    | 0.163  | 0.005 |
| Kenya | Decision at $\varepsilon,CT1$    | 0.209  | 0.005 |
| Kenya | Decision at $\varepsilon,EM3$    | 0.176  | 0.005 |
| Kenya | Decision at $\varepsilon,EM2$    | 0.195  | 0.004 |
| Kenya | Decision at $\varepsilon,EM1$    | 0.196  | 0.005 |
| Kenya | Decision at $vEM3$               | 0.338  | 0.022 |
| Kenya | Decision at $\beta_{EM,2,1}$     | 0.464  | 0.021 |
| Kenya | Decision at $\lambda_{EM,2,1}$   | 0.021  | 0.022 |
| Kenya | Decision at $\lambda_{EM,2,1}$   | 0.009  | 0.017 |
| Kenya | Decision at $vEM2$               | 0.381  | 0.02  |
| Kenya | Decision at $\beta_{EM,1,0}$     | 0.474  | 0.021 |
| Kenya | Decision at $\lambda_{EM,1,0}$   | -0.031 | 0.019 |
| Kenya | Decision at $vCT1$               | 0.772  | 0.06  |
| Kenya | Decision at $\theta_{CT,age}$    | -0.009 | 0.002 |
| Kenya | Decision at $\theta_{CT,marria}$ | 0.011  | 0.05  |
| Kenya | Decision at $\theta_{CT,highes}$ | 0.049  | 0.009 |
| Kenya | Decision at $\theta_{CT,births}$ | 0.021  | 0.007 |
| Kenya | Decision at $\theta_{CT,urban}$  | 0.092  | 0.025 |
| Kenya | Decision at $vEM3$               | 0.333  | 0.027 |
| Kenya | Decision at $\lambda_{EM,2,1}$   | 0.006  | 0.025 |
| Kenya | Decision at $\beta_{EM,2,1}$     | 0.339  | 0.026 |
| Kenya | Decision at $\lambda_{EM,2,1}$   | 0.007  | 0.026 |
| Kenya | Decision at $vEM2$               | 0.391  | 0.026 |
| Kenya | Decision at $\lambda_{EM,1,0}$   | 0.007  | 0.022 |
| Kenya | Decision at $\beta_{EM,1,0}$     | 0.298  | 0.024 |
| Kenya | Decision at $vEM1$               | 0.43   | 0.073 |
| Kenya | Decision at $\theta_{EM,age}$    | 0.003  | 0.002 |
| Kenya | Decision at $\theta_{EM,marria}$ | 0.041  | 0.05  |
| Kenya | Decision at $\theta_{EM,highes}$ | 0      | 0.011 |
| Kenya | Decision at $\theta_{EM,births}$ | -0.01  | 0.006 |
| Kenya | Decision at $\theta_{EM,urban}$  | 0.037  | 0.04  |
| Kenya | Decision at cov,CT3,EM           | 0.003  | 0.005 |
| Kenya | Decision at cov,CT2,EM           | 0.01   | 0.004 |
| Kenya | Decision at cov,CT1,EM           | 0      | 0.005 |
| Kenya | Decision at $\varepsilon,EM3$    | 0.174  | 0.005 |
| Kenya | Decision at $\varepsilon,EM2$    | 0.167  | 0.005 |
| Kenya | Decision at $\varepsilon,CT1$    | 0.216  | 0.004 |
| Kenya | Decision at $\varepsilon,EM3$    | 0.221  | 0.004 |
| Kenya | Decision at $\varepsilon,EM2$    | 0.225  | 0.004 |

|       |                                |        |       |
|-------|--------------------------------|--------|-------|
| Kenya | Decision at $\varepsilon$ ,EM1 | 0.248  | 0.001 |
| Kenya | Decision at $\nu$ EM3          | 0.252  | 0.029 |
| Kenya | Decision at $\beta$ EM,2,1     | 0.539  | 0.016 |
| Kenya | Decision at $\lambda$ EM,2,1   | 0.049  | 0.024 |
| Kenya | Decision at $\lambda$ EM,2,1   | -0.043 | 0.026 |
| Kenya | Decision at $\nu$ EM2          | 0.255  | 0.02  |
| Kenya | Decision at $\beta$ EM,1,0     | 0.554  | 0.015 |
| Kenya | Decision at $\lambda$ EM,1,0   | 0.014  | 0.02  |
| Kenya | Decision at $\nu$ CT1          | 0.164  | 0.038 |
| Kenya | Decision at $\theta$ CT,age    | -0.001 | 0.001 |
| Kenya | Decision at $\theta$ CT,marria | 0.335  | 0.022 |
| Kenya | Decision at $\theta$ CT,highes | 0.038  | 0.008 |
| Kenya | Decision at $\theta$ CT,births | 0.031  | 0.006 |
| Kenya | Decision at $\theta$ CT,urban  | 0.101  | 0.024 |
| Kenya | Decision at $\nu$ EM3          | 0.597  | 0.043 |
| Kenya | Decision at $\lambda$ EM,2,1   | 0.007  | 0.012 |
| Kenya | Decision at $\beta$ EM,2,1     | 0.33   | 0.048 |
| Kenya | Decision at $\lambda$ EM,2,1   | 0.002  | 0.011 |
| Kenya | Decision at $\nu$ EM2          | 0.701  | 0.034 |
| Kenya | Decision at $\lambda$ EM,1,0   | 0.009  | 0.014 |
| Kenya | Decision at $\beta$ EM,1,0     | 0.22   | 0.038 |
| Kenya | Decision at $\nu$ EM1          | 0.851  | 0.026 |
| Kenya | Decision at $\theta$ EM,age    | 0.001  | 0.001 |
| Kenya | Decision at $\theta$ EM,marria | -0.026 | 0.013 |
| Kenya | Decision at $\theta$ EM,highes | 0.025  | 0.006 |
| Kenya | Decision at $\theta$ EM,births | -0.011 | 0.005 |
| Kenya | Decision at $\theta$ EM,urban  | 0.021  | 0.022 |
| Kenya | Decision at cov,CT3,EM         | 0.003  | 0.002 |
| Kenya | Decision at cov,CT2,EM         | 0.005  | 0.002 |
| Kenya | Decision at cov,CT1,EM         | 0.011  | 0.003 |
| Kenya | Decision at $\varepsilon$ ,EM3 | 0.175  | 0.004 |
| Kenya | Decision at $\varepsilon$ ,EM2 | 0.17   | 0.004 |
| Kenya | Decision at $\varepsilon$ ,CT1 | 0.21   | 0.004 |
| Kenya | Decision at $\varepsilon$ ,EM3 | 0.081  | 0.007 |
| Kenya | Decision at $\varepsilon$ ,EM2 | 0.085  | 0.009 |
| Kenya | Decision at $\varepsilon$ ,EM1 | 0.104  | 0.008 |
| Kenya | Decision at $\nu$ EM3          | 0.207  | 0.025 |
| Kenya | Decision at $\beta$ EM,2,1     | 0.535  | 0.017 |
| Kenya | Decision at $\lambda$ EM,2,1   | 0.047  | 0.022 |
| Kenya | Decision at $\lambda$ EM,2,1   | 0.013  | 0.019 |
| Kenya | Decision at $\nu$ EM2          | 0.19   | 0.019 |
| Kenya | Decision at $\beta$ EM,1,0     | 0.549  | 0.015 |
| Kenya | Decision at $\lambda$ EM,1,0   | 0.091  | 0.02  |
| Kenya | Decision at $\nu$ CT1          | 0.166  | 0.039 |

|        |                                  |        |       |
|--------|----------------------------------|--------|-------|
| Kenya  | Decision at $\theta_{CT,age}$    | -0.001 | 0.002 |
| Kenya  | Decision at $\theta_{CT,marria}$ | 0.334  | 0.022 |
| Kenya  | Decision at $\theta_{CT,highes}$ | 0.038  | 0.008 |
| Kenya  | Decision at $\theta_{CT,births}$ | 0.031  | 0.006 |
| Kenya  | Decision at $\theta_{CT,urban}$  | 0.101  | 0.025 |
| Kenya  | Decision at $vEM3$               | 0.68   | 0.037 |
| Kenya  | Decision at $\lambda_{EM,2,1}$   | 0.042  | 0.01  |
| Kenya  | Decision at $\beta_{EM,2,1}$     | 0.234  | 0.039 |
| Kenya  | Decision at $\lambda_{EM,2,1}$   | -0.007 | 0.011 |
| Kenya  | Decision at $vEM2$               | 0.617  | 0.03  |
| Kenya  | Decision at $\lambda_{EM,1,0}$   | 0.037  | 0.012 |
| Kenya  | Decision at $\beta_{EM,1,0}$     | 0.286  | 0.032 |
| Kenya  | Decision at $vEM1$               | 0.789  | 0.027 |
| Kenya  | Decision at $\theta_{EM,age}$    | 0.002  | 0.001 |
| Kenya  | Decision at $\theta_{EM,marria}$ | -0.005 | 0.012 |
| Kenya  | Decision at $\theta_{EM,highes}$ | 0.028  | 0.005 |
| Kenya  | Decision at $\theta_{EM,births}$ | -0.001 | 0.004 |
| Kenya  | Decision at $\theta_{EM,urban}$  | 0.036  | 0.015 |
| Kenya  | Decision at $cov,CT3,EM$         | 0.007  | 0.002 |
| Kenya  | Decision at $cov,CT2,EM$         | 0.006  | 0.002 |
| Kenya  | Decision at $cov,CT1,EM$         | 0.012  | 0.003 |
| Kenya  | Decision at $\varepsilon,EM3$    | 0.175  | 0.004 |
| Kenya  | Decision at $\varepsilon,EM2$    | 0.17   | 0.004 |
| Kenya  | Decision at $\varepsilon,CT1$    | 0.211  | 0.004 |
| Kenya  | Decision at $\varepsilon,EM3$    | 0.077  | 0.007 |
| Kenya  | Decision at $\varepsilon,EM2$    | 0.089  | 0.007 |
| Kenya  | Decision at $\varepsilon,EM1$    | 0.094  | 0.007 |
| Uganda | Paid work $vEM3$                 | 0.233  | 0.023 |
| Uganda | Paid work $\beta_{EM,2,1}$       | 0.442  | 0.025 |
| Uganda | Paid work $\lambda_{EM,2,1}$     | 0.047  | 0.026 |
| Uganda | Paid work $\lambda_{EM,2,1}$     | -0.023 | 0.028 |
| Uganda | Paid work $vEM2$                 | 0.282  | 0.028 |
| Uganda | Paid work $\beta_{EM,1,0}$       | 0.415  | 0.032 |
| Uganda | Paid work $\lambda_{EM,1,0}$     | -0.033 | 0.035 |
| Uganda | Paid work $vCT1$                 | 0.37   | 0.056 |
| Uganda | Paid work $\theta_{CT,age}$      | -0.007 | 0.002 |
| Uganda | Paid work $\theta_{CT,marria}$   | 0.044  | 0.043 |
| Uganda | Paid work $\theta_{CT,highes}$   | 0.051  | 0.024 |
| Uganda | Paid work $\theta_{CT,births}$   | 0.046  | 0.01  |
| Uganda | Paid work $\theta_{CT,urban}$    | 0.09   | 0.039 |
| Uganda | Paid work $vEM3$                 | 0.35   | 0.029 |
| Uganda | Paid work $\lambda_{EM,2,1}$     | 0.004  | 0.035 |
| Uganda | Paid work $\beta_{EM,2,1}$       | 0.452  | 0.029 |
| Uganda | Paid work $\lambda_{EM,2,1}$     | 0.018  | 0.035 |

|        |             |                    |        |       |
|--------|-------------|--------------------|--------|-------|
| Uganda | Paid work   | $vEM2$             | 0.351  | 0.032 |
| Uganda | Paid work   | $\lambda EM,1,0$   | 0.023  | 0.03  |
| Uganda | Paid work   | $\beta EM,1,0$     | 0.366  | 0.039 |
| Uganda | Paid work   | $vEM1$             | 0.091  | 0.072 |
| Uganda | Paid work   | $\theta EM,age$    | 0.014  | 0.003 |
| Uganda | Paid work   | $\theta EM,marric$ | -0.039 | 0.035 |
| Uganda | Paid work   | $\theta EM,highes$ | 0.03   | 0.02  |
| Uganda | Paid work   | $\theta EM,births$ | -0.028 | 0.011 |
| Uganda | Paid work   | $\theta EM,urban$  | -0.025 | 0.074 |
| Uganda | Paid work   | $cov,CT3,EM$       | -0.002 | 0.005 |
| Uganda | Paid work   | $cov,CT2,EM$       | 0.005  | 0.006 |
| Uganda | Paid work   | $cov,CT1,EM$       | 0.014  | 0.007 |
| Uganda | Paid work   | $\varepsilon,EM3$  | 0.198  | 0.005 |
| Uganda | Paid work   | $\varepsilon,EM2$  | 0.205  | 0.007 |
| Uganda | Paid work   | $\varepsilon,CT1$  | 0.237  | 0.004 |
| Uganda | Paid work   | $\varepsilon,EM3$  | 0.189  | 0.007 |
| Uganda | Paid work   | $\varepsilon,EM2$  | 0.216  | 0.007 |
| Uganda | Paid work   | $\varepsilon,EM1$  | 0.239  | 0.004 |
| Uganda | Decision at | $vEM3$             | 0.356  | 0.033 |
| Uganda | Decision at | $\beta EM,2,1$     | 0.398  | 0.029 |
| Uganda | Decision at | $\lambda EM,2,1$   | -0.019 | 0.031 |
| Uganda | Decision at | $\lambda EM,2,1$   | -0.054 | 0.034 |
| Uganda | Decision at | $vEM2$             | 0.397  | 0.038 |
| Uganda | Decision at | $\beta EM,1,0$     | 0.344  | 0.04  |
| Uganda | Decision at | $\lambda EM,1,0$   | -0.078 | 0.032 |
| Uganda | Decision at | $vCT1$             | 0.517  | 0.089 |
| Uganda | Decision at | $\theta CT,age$    | -0.005 | 0.004 |
| Uganda | Decision at | $\theta CT,marric$ | -0.046 | 0.039 |
| Uganda | Decision at | $\theta CT,highes$ | 0.061  | 0.028 |
| Uganda | Decision at | $\theta CT,births$ | 0.025  | 0.013 |
| Uganda | Decision at | $\theta CT,urban$  | 0.109  | 0.04  |
| Uganda | Decision at | $vEM3$             | 0.315  | 0.042 |
| Uganda | Decision at | $\lambda EM,2,1$   | -0.077 | 0.038 |
| Uganda | Decision at | $\beta EM,2,1$     | 0.44   | 0.039 |
| Uganda | Decision at | $\lambda EM,2,1$   | 0.053  | 0.041 |
| Uganda | Decision at | $vEM2$             | 0.305  | 0.029 |
| Uganda | Decision at | $\lambda EM,1,0$   | -0.01  | 0.031 |
| Uganda | Decision at | $\beta EM,1,0$     | 0.458  | 0.033 |
| Uganda | Decision at | $vEM1$             | 0.137  | 0.094 |
| Uganda | Decision at | $\theta EM,age$    | 0.014  | 0.004 |
| Uganda | Decision at | $\theta EM,marric$ | 0.038  | 0.05  |
| Uganda | Decision at | $\theta EM,highes$ | -0.018 | 0.018 |
| Uganda | Decision at | $\theta EM,births$ | -0.012 | 0.01  |
| Uganda | Decision at | $\theta EM,urban$  | 0.076  | 0.071 |

|        |                                |        |       |
|--------|--------------------------------|--------|-------|
| Uganda | Decision at cov,CT3,EM         | 0.002  | 0.007 |
| Uganda | Decision at cov,CT2,EM         | -0.006 | 0.008 |
| Uganda | Decision at cov,CT1,EM         | -0.008 | 0.012 |
| Uganda | Decision at $\varepsilon$ ,EM3 | 0.207  | 0.006 |
| Uganda | Decision at $\varepsilon$ ,EM2 | 0.217  | 0.007 |
| Uganda | Decision at $\varepsilon$ ,CT1 | 0.242  | 0.004 |
| Uganda | Decision at $\varepsilon$ ,EM3 | 0.198  | 0.009 |
| Uganda | Decision at $\varepsilon$ ,EM2 | 0.196  | 0.008 |
| Uganda | Decision at $\varepsilon$ ,EM1 | 0.239  | 0.004 |
| Uganda | Decision at $\nu$ EM3          | 0.33   | 0.045 |
| Uganda | Decision at $\beta$ EM,2,1     | 0.41   | 0.029 |
| Uganda | Decision at $\lambda$ EM,2,1   | -0.01  | 0.04  |
| Uganda | Decision at $\lambda$ EM,2,1   | -0.022 | 0.039 |
| Uganda | Decision at $\nu$ EM2          | 0.388  | 0.042 |
| Uganda | Decision at $\beta$ EM,1,0     | 0.35   | 0.041 |
| Uganda | Decision at $\lambda$ EM,1,0   | -0.048 | 0.041 |
| Uganda | Decision at $\nu$ CT1          | 0.507  | 0.087 |
| Uganda | Decision at $\theta$ CT,age    | -0.005 | 0.004 |
| Uganda | Decision at $\theta$ CT,marria | -0.047 | 0.039 |
| Uganda | Decision at $\theta$ CT,highes | 0.062  | 0.028 |
| Uganda | Decision at $\theta$ CT,births | 0.026  | 0.013 |
| Uganda | Decision at $\theta$ CT,urban  | 0.106  | 0.04  |
| Uganda | Decision at $\nu$ EM3          | 0.525  | 0.039 |
| Uganda | Decision at $\lambda$ EM,2,1   | -0.04  | 0.038 |
| Uganda | Decision at $\beta$ EM,2,1     | 0.308  | 0.05  |
| Uganda | Decision at $\lambda$ EM,2,1   | 0.024  | 0.051 |
| Uganda | Decision at $\nu$ EM2          | 0.537  | 0.053 |
| Uganda | Decision at $\lambda$ EM,1,0   | -0.004 | 0.035 |
| Uganda | Decision at $\beta$ EM,1,0     | 0.274  | 0.054 |
| Uganda | Decision at $\nu$ EM1          | 0.313  | 0.091 |
| Uganda | Decision at $\theta$ EM,age    | 0.012  | 0.004 |
| Uganda | Decision at $\theta$ EM,marria | 0.035  | 0.036 |
| Uganda | Decision at $\theta$ EM,highes | 0.026  | 0.016 |
| Uganda | Decision at $\theta$ EM,births | -0.011 | 0.012 |
| Uganda | Decision at $\theta$ EM,urban  | 0.013  | 0.059 |
| Uganda | Decision at cov,CT3,EM         | -0.015 | 0.007 |
| Uganda | Decision at cov,CT2,EM         | 0.005  | 0.007 |
| Uganda | Decision at cov,CT1,EM         | 0.003  | 0.011 |
| Uganda | Decision at $\varepsilon$ ,EM3 | 0.207  | 0.006 |
| Uganda | Decision at $\varepsilon$ ,EM2 | 0.217  | 0.007 |
| Uganda | Decision at $\varepsilon$ ,CT1 | 0.242  | 0.004 |
| Uganda | Decision at $\varepsilon$ ,EM3 | 0.173  | 0.012 |
| Uganda | Decision at $\varepsilon$ ,EM2 | 0.183  | 0.01  |
| Uganda | Decision at $\varepsilon$ ,EM1 | 0.203  | 0.01  |



|        |                                |        |       |
|--------|--------------------------------|--------|-------|
| Uganda | Decision at $vEM3$             | 0.237  | 0.044 |
| Uganda | Decision at $\beta EM,2,1$     | 0.435  | 0.025 |
| Uganda | Decision at $\lambda EM,2,1$   | 0.048  | 0.038 |
| Uganda | Decision at $\lambda EM,2,1$   | -0.029 | 0.034 |
| Uganda | Decision at $vEM2$             | 0.31   | 0.04  |
| Uganda | Decision at $\beta EM,1,0$     | 0.408  | 0.034 |
| Uganda | Decision at $\lambda EM,1,0$   | -0.049 | 0.037 |
| Uganda | Decision at $vCT1$             | 0.39   | 0.055 |
| Uganda | Decision at $\theta CT,age$    | -0.007 | 0.002 |
| Uganda | Decision at $\theta CT,marria$ | 0.043  | 0.045 |
| Uganda | Decision at $\theta CT,highes$ | 0.05   | 0.025 |
| Uganda | Decision at $\theta CT,births$ | 0.045  | 0.01  |
| Uganda | Decision at $\theta CT,urban$  | 0.089  | 0.041 |
| Uganda | Decision at $vEM3$             | 0.64   | 0.035 |
| Uganda | Decision at $\lambda EM,2,1$   | 0.009  | 0.02  |
| Uganda | Decision at $\beta EM,2,1$     | 0.213  | 0.036 |
| Uganda | Decision at $\lambda EM,2,1$   | -0.014 | 0.025 |
| Uganda | Decision at $vEM2$             | 0.68   | 0.036 |
| Uganda | Decision at $\lambda EM,1,0$   | 0.01   | 0.024 |
| Uganda | Decision at $\beta EM,1,0$     | 0.158  | 0.037 |
| Uganda | Decision at $vEM1$             | 0.742  | 0.062 |
| Uganda | Decision at $\theta EM,age$    | -0.001 | 0.002 |
| Uganda | Decision at $\theta EM,marric$ | 0.062  | 0.036 |
| Uganda | Decision at $\theta EM,highes$ | 0.054  | 0.018 |
| Uganda | Decision at $\theta EM,births$ | -0.018 | 0.012 |
| Uganda | Decision at $\theta EM,urban$  | 0.015  | 0.051 |
| Uganda | Decision at $cov,CT3,EM$       | 0.012  | 0.005 |
| Uganda | Decision at $cov,CT2,EM$       | 0.015  | 0.008 |
| Uganda | Decision at $cov,CT1,EM$       | 0.001  | 0.006 |
| Uganda | Decision at $\varepsilon,EM3$  | 0.2    | 0.005 |
| Uganda | Decision at $\varepsilon,EM2$  | 0.207  | 0.007 |
| Uganda | Decision at $\varepsilon,CT1$  | 0.238  | 0.004 |
| Uganda | Decision at $\varepsilon,EM3$  | 0.147  | 0.011 |
| Uganda | Decision at $\varepsilon,EM2$  | 0.154  | 0.011 |
| Uganda | Decision at $\varepsilon,EM1$  | 0.183  | 0.011 |
| Uganda | Decision at $vEM3$             | 0.158  | 0.04  |
| Uganda | Decision at $\beta EM,2,1$     | 0.431  | 0.024 |
| Uganda | Decision at $\lambda EM,2,1$   | 0.069  | 0.036 |
| Uganda | Decision at $\lambda EM,2,1$   | 0.047  | 0.032 |
| Uganda | Decision at $vEM2$             | 0.25   | 0.037 |
| Uganda | Decision at $\beta EM,1,0$     | 0.4    | 0.034 |
| Uganda | Decision at $\lambda EM,1,0$   | 0.037  | 0.038 |
| Uganda | Decision at $vCT1$             | 0.408  | 0.057 |
| Uganda | Decision at $\theta CT,age$    | -0.007 | 0.003 |

|         |                                  |        |       |
|---------|----------------------------------|--------|-------|
| Uganda  | Decision at $\theta_{CT,marria}$ | 0.043  | 0.045 |
| Uganda  | Decision at $\theta_{CT,highes}$ | 0.05   | 0.025 |
| Uganda  | Decision at $\theta_{CT,births}$ | 0.045  | 0.01  |
| Uganda  | Decision at $\theta_{CT,urban}$  | 0.087  | 0.041 |
| Uganda  | Decision at $vEM3$               | 0.618  | 0.036 |
| Uganda  | Decision at $\lambda_{EM,2,1}$   | 0.004  | 0.022 |
| Uganda  | Decision at $\beta_{EM,2,1}$     | 0.285  | 0.037 |
| Uganda  | Decision at $\lambda_{EM,2,1}$   | -0.023 | 0.023 |
| Uganda  | Decision at $vEM2$               | 0.643  | 0.041 |
| Uganda  | Decision at $\lambda_{EM,1,0}$   | 0.046  | 0.019 |
| Uganda  | Decision at $\beta_{EM,1,0}$     | 0.201  | 0.042 |
| Uganda  | Decision at $vEM1$               | 0.829  | 0.059 |
| Uganda  | Decision at $\theta_{EM,age}$    | -0.001 | 0.002 |
| Uganda  | Decision at $\theta_{EM,marria}$ | 0.078  | 0.025 |
| Uganda  | Decision at $\theta_{EM,highes}$ | 0.016  | 0.011 |
| Uganda  | Decision at $\theta_{EM,births}$ | -0.01  | 0.009 |
| Uganda  | Decision at $\theta_{EM,urban}$  | 0.053  | 0.032 |
| Uganda  | Decision at $cov,CT3,EM$         | 0.011  | 0.006 |
| Uganda  | Decision at $cov,CT2,EM$         | 0.009  | 0.006 |
| Uganda  | Decision at $cov,CT1,EM$         | 0.007  | 0.006 |
| Uganda  | Decision at $\varepsilon,EM3$    | 0.199  | 0.005 |
| Uganda  | Decision at $\varepsilon,EM2$    | 0.209  | 0.007 |
| Uganda  | Decision at $\varepsilon,CT1$    | 0.239  | 0.004 |
| Uganda  | Decision at $\varepsilon,EM3$    | 0.119  | 0.011 |
| Uganda  | Decision at $\varepsilon,EM2$    | 0.134  | 0.01  |
| Uganda  | Decision at $\varepsilon,EM1$    | 0.135  | 0.009 |
| Burkina | Paid work $vEM3$                 | 0.163  | 0.018 |
| Burkina | Paid work $\beta_{EM,2,1}$       | 0.466  | 0.023 |
| Burkina | Paid work $\lambda_{EM,2,1}$     | 0.015  | 0.021 |
| Burkina | Paid work $\lambda_{EM,2,1}$     | 0      | 0.026 |
| Burkina | Paid work $vEM2$                 | 0.184  | 0.018 |
| Burkina | Paid work $\beta_{EM,1,0}$       | 0.469  | 0.02  |
| Burkina | Paid work $\lambda_{EM,1,0}$     | 0.023  | 0.024 |
| Burkina | Paid work $vCT1$                 | 0.245  | 0.052 |
| Burkina | Paid work $\theta_{CT,age}$      | -0.005 | 0.002 |
| Burkina | Paid work $\theta_{CT,marria}$   | 0.088  | 0.045 |
| Burkina | Paid work $\theta_{CT,highes}$   | 0.019  | 0.007 |
| Burkina | Paid work $\theta_{CT,births}$   | 0.037  | 0.009 |
| Burkina | Paid work $\theta_{CT,urban}$    | 0.165  | 0.034 |
| Burkina | Paid work $vEM3$                 | 0.243  | 0.03  |
| Burkina | Paid work $\lambda_{EM,2,1}$     | 0.035  | 0.02  |
| Burkina | Paid work $\beta_{EM,2,1}$       | 0.489  | 0.036 |
| Burkina | Paid work $\lambda_{EM,2,1}$     | 0.02   | 0.029 |
| Burkina | Paid work $vEM2$                 | 0.292  | 0.035 |

|         |             |                        |        |       |
|---------|-------------|------------------------|--------|-------|
| Burkina | Paid work   | $\lambda_{EM,1,0}$     | 0.035  | 0.03  |
| Burkina | Paid work   | $\beta_{EM,1,0}$       | 0.422  | 0.046 |
| Burkina | Paid work   | $v_{EM1}$              | -0.07  | 0.058 |
| Burkina | Paid work   | $\theta_{EM,age}$      | 0.015  | 0.003 |
| Burkina | Paid work   | $\theta_{EM,marriage}$ | 0.075  | 0.047 |
| Burkina | Paid work   | $\theta_{EM,highes}$   | -0.004 | 0.007 |
| Burkina | Paid work   | $\theta_{EM,births}$   | -0.034 | 0.01  |
| Burkina | Paid work   | $\theta_{EM,urban}$    | 0.182  | 0.046 |
| Burkina | Paid work   | $cov,CT3,EM$           | 0.002  | 0.005 |
| Burkina | Paid work   | $cov,CT2,EM$           | 0.009  | 0.006 |
| Burkina | Paid work   | $cov,CT1,EM$           | 0.012  | 0.006 |
| Burkina | Paid work   | $\varepsilon,EM3$      | 0.172  | 0.007 |
| Burkina | Paid work   | $\varepsilon,EM2$      | 0.178  | 0.006 |
| Burkina | Paid work   | $\varepsilon,CT1$      | 0.214  | 0.009 |
| Burkina | Paid work   | $\varepsilon,EM3$      | 0.189  | 0.009 |
| Burkina | Paid work   | $\varepsilon,EM2$      | 0.206  | 0.009 |
| Burkina | Paid work   | $\varepsilon,EM1$      | 0.215  | 0.012 |
| Burkina | Decision at | $v_{EM3}$              | 0.206  | 0.022 |
| Burkina | Decision at | $\beta_{EM,2,1}$       | 0.437  | 0.026 |
| Burkina | Decision at | $\lambda_{EM,2,1}$     | 0.014  | 0.029 |
| Burkina | Decision at | $\lambda_{EM,2,1}$     | -0.011 | 0.033 |
| Burkina | Decision at | $v_{EM2}$              | 0.204  | 0.023 |
| Burkina | Decision at | $\beta_{EM,1,0}$       | 0.439  | 0.024 |
| Burkina | Decision at | $\lambda_{EM,1,0}$     | 0.046  | 0.03  |
| Burkina | Decision at | $v_{CT1}$              | 0.536  | 0.086 |
| Burkina | Decision at | $\theta_{CT,age}$      | -0.007 | 0.002 |
| Burkina | Decision at | $\theta_{CT,marriage}$ | -0.098 | 0.074 |
| Burkina | Decision at | $\theta_{CT,highes}$   | 0.015  | 0.006 |
| Burkina | Decision at | $\theta_{CT,births}$   | 0.031  | 0.009 |
| Burkina | Decision at | $\theta_{CT,urban}$    | 0.184  | 0.04  |
| Burkina | Decision at | $v_{EM3}$              | 0.225  | 0.035 |
| Burkina | Decision at | $\lambda_{EM,2,1}$     | 0.048  | 0.029 |
| Burkina | Decision at | $\beta_{EM,2,1}$       | 0.334  | 0.038 |
| Burkina | Decision at | $\lambda_{EM,2,1}$     | 0.017  | 0.035 |
| Burkina | Decision at | $v_{EM2}$              | 0.3    | 0.033 |
| Burkina | Decision at | $\lambda_{EM,1,0}$     | 0.043  | 0.041 |
| Burkina | Decision at | $\beta_{EM,1,0}$       | 0.242  | 0.039 |
| Burkina | Decision at | $v_{EM1}$              | -0.08  | 0.1   |
| Burkina | Decision at | $\theta_{EM,age}$      | 0.009  | 0.003 |
| Burkina | Decision at | $\theta_{EM,marriage}$ | 0.125  | 0.096 |
| Burkina | Decision at | $\theta_{EM,highes}$   | 0.017  | 0.005 |
| Burkina | Decision at | $\theta_{EM,births}$   | 0.008  | 0.011 |
| Burkina | Decision at | $\theta_{EM,urban}$    | 0.024  | 0.048 |
| Burkina | Decision at | $cov,CT3,EM$           | 0.004  | 0.008 |

|         |                                |        |       |
|---------|--------------------------------|--------|-------|
| Burkina | Decision at cov,CT2,EM         | 0.004  | 0.006 |
| Burkina | Decision at cov,CT1,EM         | 0.003  | 0.008 |
| Burkina | Decision at $\varepsilon$ ,EM3 | 0.19   | 0.008 |
| Burkina | Decision at $\varepsilon$ ,EM2 | 0.192  | 0.007 |
| Burkina | Decision at $\varepsilon$ ,CT1 | 0.231  | 0.007 |
| Burkina | Decision at $\varepsilon$ ,EM3 | 0.209  | 0.008 |
| Burkina | Decision at $\varepsilon$ ,EM2 | 0.227  | 0.007 |
| Burkina | Decision at $\varepsilon$ ,EM1 | 0.222  | 0.01  |
| Burkina | Decision at $\nu$ EM3          | 0.235  | 0.036 |
| Burkina | Decision at $\beta$ EM,2,1     | 0.444  | 0.024 |
| Burkina | Decision at $\lambda$ EM,2,1   | -0.055 | 0.03  |
| Burkina | Decision at $\lambda$ EM,2,1   | 0.003  | 0.038 |
| Burkina | Decision at $\nu$ EM2          | 0.2    | 0.028 |
| Burkina | Decision at $\beta$ EM,1,0     | 0.445  | 0.022 |
| Burkina | Decision at $\lambda$ EM,1,0   | 0.02   | 0.026 |
| Burkina | Decision at $\nu$ CT1          | 0.509  | 0.088 |
| Burkina | Decision at $\theta$ CT,age    | -0.007 | 0.002 |
| Burkina | Decision at $\theta$ CT,marria | -0.103 | 0.077 |
| Burkina | Decision at $\theta$ CT,highes | 0.016  | 0.006 |
| Burkina | Decision at $\theta$ CT,births | 0.035  | 0.01  |
| Burkina | Decision at $\theta$ CT,urban  | 0.196  | 0.042 |
| Burkina | Decision at $\nu$ EM3          | 0.494  | 0.04  |
| Burkina | Decision at $\lambda$ EM,2,1   | 0.012  | 0.02  |
| Burkina | Decision at $\beta$ EM,2,1     | 0.341  | 0.041 |
| Burkina | Decision at $\lambda$ EM,2,1   | 0.038  | 0.028 |
| Burkina | Decision at $\nu$ EM2          | 0.502  | 0.04  |
| Burkina | Decision at $\lambda$ EM,1,0   | -0.015 | 0.028 |
| Burkina | Decision at $\beta$ EM,1,0     | 0.32   | 0.039 |
| Burkina | Decision at $\nu$ EM1          | 0.647  | 0.075 |
| Burkina | Decision at $\theta$ EM,age    | 0.005  | 0.002 |
| Burkina | Decision at $\theta$ EM,marria | -0.07  | 0.051 |
| Burkina | Decision at $\theta$ EM,highes | 0      | 0.004 |
| Burkina | Decision at $\theta$ EM,births | 0.006  | 0.009 |
| Burkina | Decision at $\theta$ EM,urban  | -0.04  | 0.039 |
| Burkina | Decision at cov,CT3,EM         | -0.003 | 0.005 |
| Burkina | Decision at cov,CT2,EM         | 0.009  | 0.005 |
| Burkina | Decision at cov,CT1,EM         | -0.004 | 0.007 |
| Burkina | Decision at $\varepsilon$ ,EM3 | 0.185  | 0.008 |
| Burkina | Decision at $\varepsilon$ ,EM2 | 0.19   | 0.006 |
| Burkina | Decision at $\varepsilon$ ,CT1 | 0.226  | 0.009 |
| Burkina | Decision at $\varepsilon$ ,EM3 | 0.157  | 0.011 |
| Burkina | Decision at $\varepsilon$ ,EM2 | 0.173  | 0.01  |
| Burkina | Decision at $\varepsilon$ ,EM1 | 0.176  | 0.015 |
| Burkina | Decision at $\nu$ EM3          | 0.168  | 0.018 |

|         |                                  |        |       |
|---------|----------------------------------|--------|-------|
| Burkina | Decision at $\beta_{EM,2,1}$     | 0.455  | 0.026 |
| Burkina | Decision at $\lambda_{EM,2,1}$   | 0.017  | 0.027 |
| Burkina | Decision at $\lambda_{EM,2,1}$   | 0.007  | 0.026 |
| Burkina | Decision at $\nu_{EM2}$          | 0.198  | 0.019 |
| Burkina | Decision at $\beta_{EM,1,0}$     | 0.466  | 0.021 |
| Burkina | Decision at $\lambda_{EM,1,0}$   | -0.004 | 0.029 |
| Burkina | Decision at $\nu_{CT1}$          | 0.306  | 0.061 |
| Burkina | Decision at $\theta_{CT,age}$    | -0.005 | 0.002 |
| Burkina | Decision at $\theta_{CT,marria}$ | 0.043  | 0.054 |
| Burkina | Decision at $\theta_{CT,highes}$ | 0.015  | 0.007 |
| Burkina | Decision at $\theta_{CT,births}$ | 0.036  | 0.01  |
| Burkina | Decision at $\theta_{CT,urban}$  | 0.161  | 0.039 |
| Burkina | Decision at $\nu_{EM3}$          | 0.195  | 0.028 |
| Burkina | Decision at $\lambda_{EM,2,1}$   | 0.053  | 0.027 |
| Burkina | Decision at $\beta_{EM,2,1}$     | 0.507  | 0.036 |
| Burkina | Decision at $\lambda_{EM,2,1}$   | 0.014  | 0.03  |
| Burkina | Decision at $\nu_{EM2}$          | 0.223  | 0.034 |
| Burkina | Decision at $\lambda_{EM,1,0}$   | 0.043  | 0.032 |
| Burkina | Decision at $\beta_{EM,1,0}$     | 0.429  | 0.053 |
| Burkina | Decision at $\nu_{EM1}$          | -0.153 | 0.059 |
| Burkina | Decision at $\theta_{EM,age}$    | 0.012  | 0.003 |
| Burkina | Decision at $\theta_{EM,marria}$ | 0.154  | 0.053 |
| Burkina | Decision at $\theta_{EM,highes}$ | -0.009 | 0.007 |
| Burkina | Decision at $\theta_{EM,births}$ | -0.023 | 0.01  |
| Burkina | Decision at $\theta_{EM,urban}$  | 0.195  | 0.044 |
| Burkina | Decision at $cov,CT3,EM$         | 0.003  | 0.005 |
| Burkina | Decision at $cov,CT2,EM$         | 0.013  | 0.005 |
| Burkina | Decision at $cov,CT1,EM$         | 0.013  | 0.006 |
| Burkina | Decision at $\varepsilon,EM3$    | 0.176  | 0.008 |
| Burkina | Decision at $\varepsilon,EM2$    | 0.181  | 0.007 |
| Burkina | Decision at $\varepsilon,CT1$    | 0.22   | 0.009 |
| Burkina | Decision at $\varepsilon,EM3$    | 0.179  | 0.01  |
| Burkina | Decision at $\varepsilon,EM2$    | 0.192  | 0.011 |
| Burkina | Decision at $\varepsilon,EM1$    | 0.188  | 0.015 |
| Burkina | Decision at $\nu_{EM3}$          | 0.186  | 0.019 |
| Burkina | Decision at $\beta_{EM,2,1}$     | 0.438  | 0.024 |
| Burkina | Decision at $\lambda_{EM,2,1}$   | 0.001  | 0.029 |
| Burkina | Decision at $\lambda_{EM,2,1}$   | 0.039  | 0.036 |
| Burkina | Decision at $\nu_{EM2}$          | 0.21   | 0.02  |
| Burkina | Decision at $\beta_{EM,1,0}$     | 0.455  | 0.023 |
| Burkina | Decision at $\lambda_{EM,1,0}$   | 0.007  | 0.029 |
| Burkina | Decision at $\nu_{CT1}$          | 0.51   | 0.085 |
| Burkina | Decision at $\theta_{CT,age}$    | -0.007 | 0.002 |
| Burkina | Decision at $\theta_{CT,marria}$ | -0.106 | 0.075 |

|         |                                  |        |       |
|---------|----------------------------------|--------|-------|
| Burkina | Decision at $\theta_{CT,highes}$ | 0.018  | 0.006 |
| Burkina | Decision at $\theta_{CT,births}$ | 0.037  | 0.011 |
| Burkina | Decision at $\theta_{CT,urban}$  | 0.195  | 0.042 |
| Burkina | Decision at $vEM3$               | 0.125  | 0.025 |
| Burkina | Decision at $\lambda_{EM,2,1}$   | -0.023 | 0.03  |
| Burkina | Decision at $\beta_{EM,2,1}$     | 0.306  | 0.045 |
| Burkina | Decision at $\lambda_{EM,2,1}$   | 0.056  | 0.027 |
| Burkina | Decision at $vEM2$               | 0.166  | 0.026 |
| Burkina | Decision at $\lambda_{EM,1,0}$   | -0.011 | 0.026 |
| Burkina | Decision at $\beta_{EM,1,0}$     | 0.229  | 0.039 |
| Burkina | Decision at $vEM1$               | 0.332  | 0.109 |
| Burkina | Decision at $\theta_{EM,age}$    | 0.001  | 0.003 |
| Burkina | Decision at $\theta_{EM,marric}$ | -0.097 | 0.117 |
| Burkina | Decision at $\theta_{EM,highes}$ | 0.008  | 0.005 |
| Burkina | Decision at $\theta_{EM,births}$ | 0.001  | 0.01  |
| Burkina | Decision at $\theta_{EM,urban}$  | -0.106 | 0.043 |
| Burkina | Decision at $cov,CT3,EM$         | -0.002 | 0.004 |
| Burkina | Decision at $cov,CT2,EM$         | 0.004  | 0.005 |
| Burkina | Decision at $cov,CT1,EM$         | 0.018  | 0.011 |
| Burkina | Decision at $\varepsilon,EM3$    | 0.186  | 0.008 |
| Burkina | Decision at $\varepsilon,EM2$    | 0.187  | 0.007 |
| Burkina | Decision at $\varepsilon,CT1$    | 0.225  | 0.009 |
| Burkina | Decision at $\varepsilon,EM3$    | 0.147  | 0.013 |
| Burkina | Decision at $\varepsilon,EM2$    | 0.165  | 0.012 |
| Burkina | Decision at $\varepsilon,EM1$    | 0.199  | 0.013 |
| Burkina | Decision at $vEM3$               | 0.138  | 0.023 |
| Burkina | Decision at $\beta_{EM,2,1}$     | 0.46   | 0.022 |
| Burkina | Decision at $\lambda_{EM,2,1}$   | 0.044  | 0.021 |
| Burkina | Decision at $\lambda_{EM,2,1}$   | 0.01   | 0.024 |
| Burkina | Decision at $vEM2$               | 0.179  | 0.022 |
| Burkina | Decision at $\beta_{EM,1,0}$     | 0.469  | 0.02  |
| Burkina | Decision at $\lambda_{EM,1,0}$   | 0.022  | 0.024 |
| Burkina | Decision at $vCT1$               | 0.258  | 0.053 |
| Burkina | Decision at $\theta_{CT,age}$    | -0.005 | 0.002 |
| Burkina | Decision at $\theta_{CT,marric}$ | 0.08   | 0.046 |
| Burkina | Decision at $\theta_{CT,highes}$ | 0.019  | 0.007 |
| Burkina | Decision at $\theta_{CT,births}$ | 0.035  | 0.009 |
| Burkina | Decision at $\theta_{CT,urban}$  | 0.163  | 0.034 |
| Burkina | Decision at $vEM3$               | 0.362  | 0.046 |
| Burkina | Decision at $\lambda_{EM,2,1}$   | 0.062  | 0.036 |
| Burkina | Decision at $\beta_{EM,2,1}$     | 0.35   | 0.05  |
| Burkina | Decision at $\lambda_{EM,2,1}$   | 0.065  | 0.022 |
| Burkina | Decision at $vEM2$               | 0.495  | 0.049 |
| Burkina | Decision at $\lambda_{EM,1,0}$   | 0.058  | 0.033 |

|         |                                  |        |       |
|---------|----------------------------------|--------|-------|
| Burkina | Decision at $\beta_{EM,1,0}$     | 0.26   | 0.055 |
| Burkina | Decision at $v_{EM1}$            | 0.756  | 0.068 |
| Burkina | Decision at $\theta_{EM,age}$    | -0.006 | 0.002 |
| Burkina | Decision at $\theta_{EM,marria}$ | -0.012 | 0.049 |
| Burkina | Decision at $\theta_{EM,highes}$ | 0.011  | 0.006 |
| Burkina | Decision at $\theta_{EM,births}$ | 0.005  | 0.012 |
| Burkina | Decision at $\theta_{EM,urban}$  | 0.029  | 0.055 |
| Burkina | Decision at $cov,CT3,EM$         | 0.006  | 0.004 |
| Burkina | Decision at $cov,CT2,EM$         | 0.003  | 0.006 |
| Burkina | Decision at $cov,CT1,EM$         | 0.015  | 0.007 |
| Burkina | Decision at $\varepsilon,EM3$    | 0.174  | 0.008 |
| Burkina | Decision at $\varepsilon,EM2$    | 0.178  | 0.006 |
| Burkina | Decision at $\varepsilon,CT1$    | 0.216  | 0.009 |
| Burkina | Decision at $\varepsilon,EM3$    | 0.199  | 0.013 |
| Burkina | Decision at $\varepsilon,EM2$    | 0.203  | 0.011 |
| Burkina | Decision at $\varepsilon,EM1$    | 0.236  | 0.008 |
| Burkina | Decision at $v_{EM3}$            | 0.109  | 0.024 |
| Burkina | Decision at $\beta_{EM,2,1}$     | 0.461  | 0.024 |
| Burkina | Decision at $\lambda_{EM,2,1}$   | 0.065  | 0.028 |
| Burkina | Decision at $\lambda_{EM,2,1}$   | 0.018  | 0.021 |
| Burkina | Decision at $v_{EM2}$            | 0.14   | 0.023 |
| Burkina | Decision at $\beta_{EM,1,0}$     | 0.463  | 0.021 |
| Burkina | Decision at $\lambda_{EM,1,0}$   | 0.075  | 0.025 |
| Burkina | Decision at $v_{CT1}$            | 0.268  | 0.054 |
| Burkina | Decision at $\theta_{CT,age}$    | -0.005 | 0.002 |
| Burkina | Decision at $\theta_{CT,marria}$ | 0.079  | 0.048 |
| Burkina | Decision at $\theta_{CT,highes}$ | 0.019  | 0.007 |
| Burkina | Decision at $\theta_{CT,births}$ | 0.036  | 0.01  |
| Burkina | Decision at $\theta_{CT,urban}$  | 0.166  | 0.035 |
| Burkina | Decision at $v_{EM3}$            | 0.506  | 0.065 |
| Burkina | Decision at $\lambda_{EM,2,1}$   | 0.026  | 0.021 |
| Burkina | Decision at $\beta_{EM,2,1}$     | 0.359  | 0.074 |
| Burkina | Decision at $\lambda_{EM,2,1}$   | 0.037  | 0.019 |
| Burkina | Decision at $v_{EM2}$            | 0.525  | 0.051 |
| Burkina | Decision at $\lambda_{EM,1,0}$   | 0.07   | 0.023 |
| Burkina | Decision at $\beta_{EM,1,0}$     | 0.316  | 0.056 |
| Burkina | Decision at $v_{EM1}$            | 0.714  | 0.055 |
| Burkina | Decision at $\theta_{EM,age}$    | 0      | 0.002 |
| Burkina | Decision at $\theta_{EM,marria}$ | 0.024  | 0.03  |
| Burkina | Decision at $\theta_{EM,highes}$ | 0.01   | 0.005 |
| Burkina | Decision at $\theta_{EM,births}$ | 0.002  | 0.007 |
| Burkina | Decision at $\theta_{EM,urban}$  | 0.002  | 0.044 |
| Burkina | Decision at $cov,CT3,EM$         | 0.004  | 0.004 |
| Burkina | Decision at $cov,CT2,EM$         | 0.001  | 0.004 |

|         |                                |        |       |
|---------|--------------------------------|--------|-------|
| Burkina | Decision at cov,CT1,EM         | 0.013  | 0.006 |
| Burkina | Decision at $\varepsilon$ ,EM3 | 0.173  | 0.007 |
| Burkina | Decision at $\varepsilon$ ,EM2 | 0.179  | 0.006 |
| Burkina | Decision at $\varepsilon$ ,CT1 | 0.217  | 0.009 |
| Burkina | Decision at $\varepsilon$ ,EM3 | 0.13   | 0.013 |
| Burkina | Decision at $\varepsilon$ ,EM2 | 0.146  | 0.011 |
| Burkina | Decision at $\varepsilon$ ,EM1 | 0.182  | 0.015 |
| DRC     | Paid work $v$ EM3              | 0.222  | 0.021 |
| DRC     | Paid work $\beta$ EM,2,1       | 0.443  | 0.025 |
| DRC     | Paid work $\lambda$ EM,2,1     | -0.024 | 0.029 |
| DRC     | Paid work $\lambda$ EM,2,1     | 0.01   | 0.033 |
| DRC     | Paid work $v$ EM2              | 0.231  | 0.024 |
| DRC     | Paid work $\beta$ EM,1,0       | 0.514  | 0.025 |
| DRC     | Paid work $\lambda$ EM,1,0     | 0.016  | 0.028 |
| DRC     | Paid work $v$ CT1              | 0.421  | 0.065 |
| DRC     | Paid work $\theta$ CT,age      | -0.004 | 0.003 |
| DRC     | Paid work $\theta$ CT,marria   | 0.082  | 0.041 |
| DRC     | Paid work $\theta$ CT,highes   | 0.003  | 0.002 |
| DRC     | Paid work $\theta$ CT,births   | 0.039  | 0.01  |
| DRC     | Paid work $v$ EM3              | 0.233  | 0.027 |
| DRC     | Paid work $\lambda$ EM,2,1     | 0.018  | 0.032 |
| DRC     | Paid work $\beta$ EM,2,1       | 0.524  | 0.039 |
| DRC     | Paid work $\lambda$ EM,2,1     | 0.024  | 0.03  |
| DRC     | Paid work $v$ EM2              | 0.289  | 0.037 |
| DRC     | Paid work $\lambda$ EM,1,0     | 0.04   | 0.035 |
| DRC     | Paid work $\beta$ EM,1,0       | 0.481  | 0.031 |
| DRC     | Paid work $v$ EM1              | -0.115 | 0.058 |
| DRC     | Paid work $\theta$ EM,age      | 0.02   | 0.002 |
| DRC     | Paid work $\theta$ EM,marria   | 0.068  | 0.048 |
| DRC     | Paid work $\theta$ EM,highes   | 0      | 0.005 |
| DRC     | Paid work $\theta$ EM,births   | -0.049 | 0.01  |
| DRC     | Paid work cov,CT3,EM           | -0.001 | 0.005 |
| DRC     | Paid work cov,CT2,EM           | 0.004  | 0.008 |
| DRC     | Paid work cov,CT1,EM           | 0.022  | 0.008 |
| DRC     | Paid work $\varepsilon$ ,EM3   | 0.194  | 0.005 |
| DRC     | Paid work $\varepsilon$ ,EM2   | 0.183  | 0.006 |
| DRC     | Paid work $\varepsilon$ ,CT1   | 0.237  | 0.004 |
| DRC     | Paid work $\varepsilon$ ,EM3   | 0.18   | 0.009 |
| DRC     | Paid work $\varepsilon$ ,EM2   | 0.195  | 0.008 |
| DRC     | Paid work $\varepsilon$ ,EM1   | 0.212  | 0.008 |
| DRC     | Decision at $v$ EM3            | 0.244  | 0.038 |
| DRC     | Decision at $\beta$ EM,2,1     | 0.397  | 0.041 |
| DRC     | Decision at $\lambda$ EM,2,1   | -0.007 | 0.041 |
| DRC     | Decision at $\lambda$ EM,2,1   | -0.01  | 0.039 |



|     |                                |        |       |
|-----|--------------------------------|--------|-------|
| DRC | Decision at $vEM2$             | 0.298  | 0.041 |
| DRC | Decision at $\beta EM,1,0$     | 0.491  | 0.032 |
| DRC | Decision at $\lambda EM,1,0$   | -0.056 | 0.045 |
| DRC | Decision at $vCT1$             | 0.941  | 0.122 |
| DRC | Decision at $\theta CT,age$    | -0.015 | 0.004 |
| DRC | Decision at $\theta CT,marria$ | 0.016  | 0.052 |
| DRC | Decision at $\theta CT,highes$ | 0      | 0.004 |
| DRC | Decision at $\theta CT,births$ | 0.024  | 0.013 |
| DRC | Decision at $vEM3$             | 0.375  | 0.049 |
| DRC | Decision at $\lambda EM,2,1$   | -0.057 | 0.052 |
| DRC | Decision at $\beta EM,2,1$     | 0.382  | 0.04  |
| DRC | Decision at $\lambda EM,2,1$   | 0.058  | 0.037 |
| DRC | Decision at $vEM2$             | 0.457  | 0.047 |
| DRC | Decision at $\lambda EM,1,0$   | -0.021 | 0.044 |
| DRC | Decision at $\beta EM,1,0$     | 0.317  | 0.04  |
| DRC | Decision at $vEM1$             | 0.212  | 0.127 |
| DRC | Decision at $\theta EM,age$    | 0.012  | 0.003 |
| DRC | Decision at $\theta EM,marria$ | 0.121  | 0.059 |
| DRC | Decision at $\theta EM,highes$ | 0.005  | 0.002 |
| DRC | Decision at $\theta EM,births$ | -0.03  | 0.01  |
| DRC | Decision at $cov,CT3,EM$       | -0.005 | 0.009 |
| DRC | Decision at $cov,CT2,EM$       | -0.007 | 0.007 |
| DRC | Decision at $cov,CT1,EM$       | -0.008 | 0.01  |
| DRC | Decision at $\varepsilon,EM3$  | 0.207  | 0.008 |
| DRC | Decision at $\varepsilon,EM2$  | 0.187  | 0.008 |
| DRC | Decision at $\varepsilon,CT1$  | 0.24   | 0.006 |
| DRC | Decision at $\varepsilon,EM3$  | 0.201  | 0.012 |
| DRC | Decision at $\varepsilon,EM2$  | 0.206  | 0.011 |
| DRC | Decision at $\varepsilon,EM1$  | 0.225  | 0.008 |
| DRC | Decision at $vEM3$             | 0.256  | 0.053 |
| DRC | Decision at $\beta EM,2,1$     | 0.403  | 0.041 |
| DRC | Decision at $\lambda EM,2,1$   | -0.052 | 0.06  |
| DRC | Decision at $\lambda EM,2,1$   | 0.022  | 0.048 |
| DRC | Decision at $vEM2$             | 0.347  | 0.06  |
| DRC | Decision at $\beta EM,1,0$     | 0.496  | 0.032 |
| DRC | Decision at $\lambda EM,1,0$   | -0.107 | 0.066 |
| DRC | Decision at $vCT1$             | 0.936  | 0.122 |
| DRC | Decision at $\theta CT,age$    | -0.014 | 0.004 |
| DRC | Decision at $\theta CT,marria$ | 0.013  | 0.052 |
| DRC | Decision at $\theta CT,highes$ | 0      | 0.004 |
| DRC | Decision at $\theta CT,births$ | 0.024  | 0.013 |
| DRC | Decision at $vEM3$             | 0.562  | 0.055 |
| DRC | Decision at $\lambda EM,2,1$   | -0.02  | 0.05  |
| DRC | Decision at $\beta EM,2,1$     | 0.319  | 0.071 |

|     |                                  |        |       |
|-----|----------------------------------|--------|-------|
| DRC | Decision at $\lambda_{EM,2,1}$   | 0.039  | 0.025 |
| DRC | Decision at $\nu_{EM2}$          | 0.532  | 0.051 |
| DRC | Decision at $\lambda_{EM,1,0}$   | 0.016  | 0.055 |
| DRC | Decision at $\beta_{EM,1,0}$     | 0.296  | 0.066 |
| DRC | Decision at $\nu_{EM1}$          | 0.504  | 0.131 |
| DRC | Decision at $\theta_{EM,age}$    | 0.007  | 0.003 |
| DRC | Decision at $\theta_{EM,marria$  | 0.079  | 0.061 |
| DRC | Decision at $\theta_{EM,highe$   | 0.001  | 0.002 |
| DRC | Decision at $\theta_{EM,births}$ | 0.002  | 0.008 |
| DRC | Decision at $cov,CT3,EM$         | -0.004 | 0.008 |
| DRC | Decision at $cov,CT2,EM$         | -0.01  | 0.007 |
| DRC | Decision at $cov,CT1,EM$         | 0.003  | 0.011 |
| DRC | Decision at $\varepsilon,EM3$    | 0.206  | 0.008 |
| DRC | Decision at $\varepsilon,EM2$    | 0.186  | 0.009 |
| DRC | Decision at $\varepsilon,CT1$    | 0.241  | 0.006 |
| DRC | Decision at $\varepsilon,EM3$    | 0.129  | 0.018 |
| DRC | Decision at $\varepsilon,EM2$    | 0.158  | 0.016 |
| DRC | Decision at $\varepsilon,EM1$    | 0.149  | 0.019 |
| DRC | Decision at $\nu_{EM3}$          | 0.219  | 0.023 |
| DRC | Decision at $\beta_{EM,2,1}$     | 0.43   | 0.03  |
| DRC | Decision at $\lambda_{EM,2,1}$   | -0.019 | 0.041 |
| DRC | Decision at $\lambda_{EM,2,1}$   | 0.023  | 0.043 |
| DRC | Decision at $\nu_{EM2}$          | 0.23   | 0.027 |
| DRC | Decision at $\beta_{EM,1,0}$     | 0.533  | 0.027 |
| DRC | Decision at $\lambda_{EM,1,0}$   | 0.006  | 0.038 |
| DRC | Decision at $\nu_{CT1}$          | 0.368  | 0.074 |
| DRC | Decision at $\theta_{CT,age}$    | -0.001 | 0.003 |
| DRC | Decision at $\theta_{CT,marria$  | 0.061  | 0.05  |
| DRC | Decision at $\theta_{CT,highe$   | -0.001 | 0.005 |
| DRC | Decision at $\theta_{CT,births}$ | 0.034  | 0.011 |
| DRC | Decision at $\nu_{EM3}$          | 0.139  | 0.029 |
| DRC | Decision at $\lambda_{EM,2,1}$   | 0.028  | 0.035 |
| DRC | Decision at $\beta_{EM,2,1}$     | 0.546  | 0.043 |
| DRC | Decision at $\lambda_{EM,2,1}$   | 0.059  | 0.032 |
| DRC | Decision at $\nu_{EM2}$          | 0.135  | 0.028 |
| DRC | Decision at $\lambda_{EM,1,0}$   | 0.071  | 0.034 |
| DRC | Decision at $\beta_{EM,1,0}$     | 0.515  | 0.04  |
| DRC | Decision at $\nu_{EM1}$          | -0.25  | 0.068 |
| DRC | Decision at $\theta_{EM,age}$    | 0.016  | 0.003 |
| DRC | Decision at $\theta_{EM,marria$  | 0.159  | 0.044 |
| DRC | Decision at $\theta_{EM,highe$   | 0.001  | 0.003 |
| DRC | Decision at $\theta_{EM,births}$ | -0.03  | 0.011 |
| DRC | Decision at $cov,CT3,EM$         | 0.003  | 0.006 |
| DRC | Decision at $cov,CT2,EM$         | 0.003  | 0.007 |

|     |                                |        |       |
|-----|--------------------------------|--------|-------|
| DRC | Decision at cov,CT1,EM         | 0.019  | 0.009 |
| DRC | Decision at $\varepsilon$ ,EM3 | 0.198  | 0.007 |
| DRC | Decision at $\varepsilon$ ,EM2 | 0.179  | 0.007 |
| DRC | Decision at $\varepsilon$ ,CT1 | 0.24   | 0.004 |
| DRC | Decision at $\varepsilon$ ,EM3 | 0.157  | 0.012 |
| DRC | Decision at $\varepsilon$ ,EM2 | 0.153  | 0.012 |
| DRC | Decision at $\varepsilon$ ,EM1 | 0.145  | 0.01  |
| DRC | Decision at vEM3               | 0.219  | 0.044 |
| DRC | Decision at $\beta$ EM,2,1     | 0.402  | 0.041 |
| DRC | Decision at $\lambda$ EM,2,1   | 0.007  | 0.038 |
| DRC | Decision at $\lambda$ EM,2,1   | 0.019  | 0.05  |
| DRC | Decision at vEM2               | 0.261  | 0.037 |
| DRC | Decision at $\beta$ EM,1,0     | 0.498  | 0.031 |
| DRC | Decision at $\lambda$ EM,1,0   | 0      | 0.036 |
| DRC | Decision at vCT1               | 0.949  | 0.119 |
| DRC | Decision at $\theta$ CT,age    | -0.015 | 0.004 |
| DRC | Decision at $\theta$ CT,marria | 0.01   | 0.051 |
| DRC | Decision at $\theta$ CT,highes | 0.001  | 0.004 |
| DRC | Decision at $\theta$ CT,births | 0.025  | 0.013 |
| DRC | Decision at vEM3               | 0.508  | 0.057 |
| DRC | Decision at $\lambda$ EM,2,1   | -0.071 | 0.054 |
| DRC | Decision at $\beta$ EM,2,1     | 0.219  | 0.053 |
| DRC | Decision at $\lambda$ EM,2,1   | 0.014  | 0.042 |
| DRC | Decision at vEM2               | 0.452  | 0.043 |
| DRC | Decision at $\lambda$ EM,1,0   | -0.01  | 0.048 |
| DRC | Decision at $\beta$ EM,1,0     | 0.281  | 0.05  |
| DRC | Decision at vEM1               | 0.439  | 0.092 |
| DRC | Decision at $\theta$ EM,age    | 0.004  | 0.003 |
| DRC | Decision at $\theta$ EM,marria | 0.125  | 0.049 |
| DRC | Decision at $\theta$ EM,highes | 0.008  | 0.005 |
| DRC | Decision at $\theta$ EM,births | -0.024 | 0.012 |
| DRC | Decision at cov,CT3,EM         | -0.016 | 0.009 |
| DRC | Decision at cov,CT2,EM         | -0.011 | 0.007 |
| DRC | Decision at cov,CT1,EM         | -0.003 | 0.011 |
| DRC | Decision at $\varepsilon$ ,EM3 | 0.207  | 0.008 |
| DRC | Decision at $\varepsilon$ ,EM2 | 0.187  | 0.008 |
| DRC | Decision at $\varepsilon$ ,CT1 | 0.24   | 0.006 |
| DRC | Decision at $\varepsilon$ ,EM3 | 0.225  | 0.009 |
| DRC | Decision at $\varepsilon$ ,EM2 | 0.218  | 0.009 |
| DRC | Decision at $\varepsilon$ ,EM1 | 0.235  | 0.006 |
| DRC | Decision at vEM3               | 0.236  | 0.03  |
| DRC | Decision at $\beta$ EM,2,1     | 0.435  | 0.025 |
| DRC | Decision at $\lambda$ EM,2,1   | -0.03  | 0.023 |
| DRC | Decision at $\lambda$ EM,2,1   | 0.006  | 0.032 |

|     |                                |        |       |
|-----|--------------------------------|--------|-------|
| DRC | Decision at $vEM2$             | 0.254  | 0.031 |
| DRC | Decision at $\beta EM,1,0$     | 0.515  | 0.024 |
| DRC | Decision at $\lambda EM,1,0$   | -0.018 | 0.03  |
| DRC | Decision at $vCT1$             | 0.442  | 0.066 |
| DRC | Decision at $\theta CT,age$    | -0.004 | 0.003 |
| DRC | Decision at $\theta CT,marria$ | 0.085  | 0.041 |
| DRC | Decision at $\theta CT,highes$ | 0.002  | 0.002 |
| DRC | Decision at $\theta CT,births$ | 0.038  | 0.01  |
| DRC | Decision at $vEM3$             | 0.553  | 0.038 |
| DRC | Decision at $\lambda EM,2,1$   | 0      | 0.032 |
| DRC | Decision at $\beta EM,2,1$     | 0.321  | 0.046 |
| DRC | Decision at $\lambda EM,2,1$   | -0.025 | 0.03  |
| DRC | Decision at $vEM2$             | 0.5    | 0.044 |
| DRC | Decision at $\lambda EM,1,0$   | -0.04  | 0.028 |
| DRC | Decision at $\beta EM,1,0$     | 0.25   | 0.046 |
| DRC | Decision at $vEM1$             | 0.805  | 0.054 |
| DRC | Decision at $\theta EM,age$    | -0.002 | 0.002 |
| DRC | Decision at $\theta EM,marria$ | 0.008  | 0.042 |
| DRC | Decision at $\theta EM,highes$ | -0.002 | 0.003 |
| DRC | Decision at $\theta EM,births$ | -0.02  | 0.01  |
| DRC | Decision at $cov,CT3,EM$       | 0.003  | 0.006 |
| DRC | Decision at $cov,CT2,EM$       | -0.001 | 0.007 |
| DRC | Decision at $cov,CT1,EM$       | 0.013  | 0.006 |
| DRC | Decision at $\varepsilon,EM3$  | 0.196  | 0.005 |
| DRC | Decision at $\varepsilon,EM2$  | 0.184  | 0.006 |
| DRC | Decision at $\varepsilon,CT1$  | 0.238  | 0.004 |
| DRC | Decision at $\varepsilon,EM3$  | 0.162  | 0.011 |
| DRC | Decision at $\varepsilon,EM2$  | 0.212  | 0.011 |
| DRC | Decision at $\varepsilon,EM1$  | 0.204  | 0.01  |
| DRC | Decision at $vEM3$             | 0.23   | 0.033 |
| DRC | Decision at $\beta EM,2,1$     | 0.438  | 0.025 |
| DRC | Decision at $\lambda EM,2,1$   | -0.004 | 0.028 |
| DRC | Decision at $\lambda EM,2,1$   | -0.011 | 0.028 |
| DRC | Decision at $vEM2$             | 0.239  | 0.03  |
| DRC | Decision at $\beta EM,1,0$     | 0.509  | 0.024 |
| DRC | Decision at $\lambda EM,1,0$   | 0.007  | 0.029 |
| DRC | Decision at $vCT1$             | 0.439  | 0.066 |
| DRC | Decision at $\theta CT,age$    | -0.004 | 0.003 |
| DRC | Decision at $\theta CT,marria$ | 0.075  | 0.04  |
| DRC | Decision at $\theta CT,highes$ | 0.002  | 0.005 |
| DRC | Decision at $\theta CT,births$ | 0.038  | 0.01  |
| DRC | Decision at $vEM3$             | 0.682  | 0.036 |
| DRC | Decision at $\lambda EM,2,1$   | 0.054  | 0.024 |
| DRC | Decision at $\beta EM,2,1$     | 0.196  | 0.04  |

|      |                                  |        |       |
|------|----------------------------------|--------|-------|
| DRC  | Decision at $\lambda_{EM,2,1}$   | -0.01  | 0.02  |
| DRC  | Decision at $v_{EM2}$            | 0.514  | 0.048 |
| DRC  | Decision at $\lambda_{EM,1,0}$   | 0.018  | 0.03  |
| DRC  | Decision at $\beta_{EM,1,0}$     | 0.229  | 0.043 |
| DRC  | Decision at $v_{EM1}$            | 0.725  | 0.05  |
| DRC  | Decision at $\theta_{EM,age}$    | 0.002  | 0.002 |
| DRC  | Decision at $\theta_{EM,marria$  | 0.023  | 0.043 |
| DRC  | Decision at $\theta_{EM,highes$  | 0.004  | 0.003 |
| DRC  | Decision at $\theta_{EM,births}$ | -0.01  | 0.01  |
| DRC  | Decision at $cov,CT3,EM$         | 0.008  | 0.004 |
| DRC  | Decision at $cov,CT2,EM$         | 0.009  | 0.007 |
| DRC  | Decision at $cov,CT1,EM$         | 0.008  | 0.007 |
| DRC  | Decision at $\varepsilon,EM3$    | 0.197  | 0.005 |
| DRC  | Decision at $\varepsilon,EM2$    | 0.185  | 0.006 |
| DRC  | Decision at $\varepsilon,CT1$    | 0.239  | 0.004 |
| DRC  | Decision at $\varepsilon,EM3$    | 0.126  | 0.012 |
| DRC  | Decision at $\varepsilon,EM2$    | 0.202  | 0.015 |
| DRC  | Decision at $\varepsilon,EM1$    | 0.182  | 0.014 |
| Kano | Paid work $v_{EM3}$              | 0.141  | 0.032 |
| Kano | Paid work $\beta_{EM,2,1}$       | 0.547  | 0.052 |
| Kano | Paid work $\lambda_{EM,2,1}$     | -0.051 | 0.027 |
| Kano | Paid work $\lambda_{EM,2,1}$     | 0.021  | 0.032 |
| Kano | Paid work $v_{EM2}$              | 0.058  | 0.021 |
| Kano | Paid work $\beta_{EM,1,0}$       | 0.487  | 0.07  |
| Kano | Paid work $\lambda_{EM,1,0}$     | 0      | 0.027 |
| Kano | Paid work $v_{CT1}$              | -0.156 | 0.071 |
| Kano | Paid work $\theta_{CT,age}$      | 0      | 0.002 |
| Kano | Paid work $\theta_{CT,marria$    | 0.127  | 0.036 |
| Kano | Paid work $\theta_{CT,highes$    | 0.056  | 0.021 |
| Kano | Paid work $\theta_{CT,births}$   | 0.015  | 0.006 |
| Kano | Paid work $\theta_{CT,urban}$    | 0.115  | 0.041 |
| Kano | Paid work $v_{EM3}$              | 0.383  | 0.051 |
| Kano | Paid work $\lambda_{EM,2,1}$     | 0.105  | 0.046 |
| Kano | Paid work $\beta_{EM,2,1}$       | 0.333  | 0.049 |
| Kano | Paid work $\lambda_{EM,2,1}$     | 0.115  | 0.077 |
| Kano | Paid work $v_{EM2}$              | 0.43   | 0.038 |
| Kano | Paid work $\lambda_{EM,1,0}$     | 0.121  | 0.047 |
| Kano | Paid work $\beta_{EM,1,0}$       | 0.358  | 0.046 |
| Kano | Paid work $v_{EM1}$              | 0.058  | 0.113 |
| Kano | Paid work $\theta_{EM,age}$      | 0.014  | 0.004 |
| Kano | Paid work $\theta_{EM,marria$    | 0.038  | 0.087 |
| Kano | Paid work $\theta_{EM,highes$    | 0.085  | 0.036 |
| Kano | Paid work $\theta_{EM,births}$   | 0.019  | 0.012 |
| Kano | Paid work $\theta_{EM,urban}$    | -0.062 | 0.098 |

|      |             |                    |        |       |
|------|-------------|--------------------|--------|-------|
| Kano | Paid work   | cov,CT3,EM         | 0.01   | 0.007 |
| Kano | Paid work   | cov,CT2,EM         | 0.006  | 0.006 |
| Kano | Paid work   | cov,CT1,EM         | 0.009  | 0.005 |
| Kano | Paid work   | $\varepsilon$ ,EM3 | 0.118  | 0.016 |
| Kano | Paid work   | $\varepsilon$ ,EM2 | 0.072  | 0.014 |
| Kano | Paid work   | $\varepsilon$ ,CT1 | 0.075  | 0.015 |
| Kano | Paid work   | $\varepsilon$ ,EM3 | 0.205  | 0.012 |
| Kano | Paid work   | $\varepsilon$ ,EM2 | 0.193  | 0.011 |
| Kano | Paid work   | $\varepsilon$ ,EM1 | 0.213  | 0.011 |
| Kano | Decision at | $\nu$ EM3          | 0.119  | 0.033 |
| Kano | Decision at | $\beta$ EM,2,1     | 0.492  | 0.054 |
| Kano | Decision at | $\lambda$ EM,2,1   | 0.067  | 0.055 |
| Kano | Decision at | $\lambda$ EM,2,1   | 0.063  | 0.044 |
| Kano | Decision at | $\nu$ EM2          | 0.059  | 0.023 |
| Kano | Decision at | $\beta$ EM,1,0     | 0.48   | 0.074 |
| Kano | Decision at | $\lambda$ EM,1,0   | 0.053  | 0.038 |
| Kano | Decision at | $\nu$ CT1          | 0.571  | 0.428 |
| Kano | Decision at | $\theta$ CT,age    | -0.001 | 0.002 |
| Kano | Decision at | $\theta$ CT,marria | -0.595 | 0.438 |
| Kano | Decision at | $\theta$ CT,highes | 0.061  | 0.024 |
| Kano | Decision at | $\theta$ CT,births | 0.017  | 0.006 |
| Kano | Decision at | $\theta$ CT,urban  | 0.163  | 0.051 |
| Kano | Decision at | $\nu$ EM3          | 0.193  | 0.061 |
| Kano | Decision at | $\lambda$ EM,2,1   | 0.036  | 0.071 |
| Kano | Decision at | $\beta$ EM,2,1     | 0.493  | 0.072 |
| Kano | Decision at | $\lambda$ EM,2,1   | 0.179  | 0.052 |
| Kano | Decision at | $\nu$ EM2          | 0.172  | 0.056 |
| Kano | Decision at | $\lambda$ EM,1,0   | 0.202  | 0.084 |
| Kano | Decision at | $\beta$ EM,1,0     | 0.371  | 0.068 |
| Kano | Decision at | $\nu$ EM1          | 0.182  | 0.267 |
| Kano | Decision at | $\theta$ EM,age    | 0      | 0.004 |
| Kano | Decision at | $\theta$ EM,marria | -0.091 | 0.273 |
| Kano | Decision at | $\theta$ EM,highes | 0.039  | 0.051 |
| Kano | Decision at | $\theta$ EM,births | 0.015  | 0.015 |
| Kano | Decision at | $\theta$ EM,urban  | 0.374  | 0.141 |
| Kano | Decision at | cov,CT3,EM         | 0.001  | 0.013 |
| Kano | Decision at | cov,CT2,EM         | 0.005  | 0.005 |
| Kano | Decision at | cov,CT1,EM         | 0      | 0.008 |
| Kano | Decision at | $\varepsilon$ ,EM3 | 0.14   | 0.018 |
| Kano | Decision at | $\varepsilon$ ,EM2 | 0.089  | 0.019 |
| Kano | Decision at | $\varepsilon$ ,CT1 | 0.094  | 0.019 |
| Kano | Decision at | $\varepsilon$ ,EM3 | 0.171  | 0.027 |
| Kano | Decision at | $\varepsilon$ ,EM2 | 0.176  | 0.026 |
| Kano | Decision at | $\varepsilon$ ,EM1 | 0.171  | 0.024 |

|      |                                |        |       |
|------|--------------------------------|--------|-------|
| Kano | Decision at $vEM3$             | 0.119  | 0.038 |
| Kano | Decision at $\beta EM,2,1$     | 0.493  | 0.058 |
| Kano | Decision at $\lambda EM,2,1$   | 0.096  | 0.069 |
| Kano | Decision at $\lambda EM,2,1$   | -0.013 | 0.058 |
| Kano | Decision at $vEM2$             | 0.06   | 0.024 |
| Kano | Decision at $\beta EM,1,0$     | 0.478  | 0.077 |
| Kano | Decision at $\lambda EM,1,0$   | 0.044  | 0.038 |
| Kano | Decision at $vCT1$             | 0.577  | 0.427 |
| Kano | Decision at $\theta CT,age$    | -0.001 | 0.002 |
| Kano | Decision at $\theta CT,marria$ | -0.593 | 0.437 |
| Kano | Decision at $\theta CT,highes$ | 0.06   | 0.024 |
| Kano | Decision at $\theta CT,births$ | 0.017  | 0.006 |
| Kano | Decision at $\theta CT,urban$  | 0.168  | 0.049 |
| Kano | Decision at $vEM3$             | 0.219  | 0.066 |
| Kano | Decision at $\lambda EM,2,1$   | 0.054  | 0.073 |
| Kano | Decision at $\beta EM,2,1$     | 0.567  | 0.086 |
| Kano | Decision at $\lambda EM,2,1$   | 0.065  | 0.067 |
| Kano | Decision at $vEM2$             | 0.27   | 0.081 |
| Kano | Decision at $\lambda EM,1,0$   | 0.148  | 0.089 |
| Kano | Decision at $\beta EM,1,0$     | 0.433  | 0.09  |
| Kano | Decision at $vEM1$             | 0.098  | 0.283 |
| Kano | Decision at $\theta EM,age$    | -0.002 | 0.004 |
| Kano | Decision at $\theta EM,marria$ | 0.166  | 0.275 |
| Kano | Decision at $\theta EM,highes$ | 0.038  | 0.061 |
| Kano | Decision at $\theta EM,births$ | 0.009  | 0.009 |
| Kano | Decision at $\theta EM,urban$  | 0.531  | 0.114 |
| Kano | Decision at $cov,CT3,EM$       | 0.001  | 0.008 |
| Kano | Decision at $cov,CT2,EM$       | 0.002  | 0.007 |
| Kano | Decision at $cov,CT1,EM$       | -0.006 | 0.007 |
| Kano | Decision at $\varepsilon,EM3$  | 0.143  | 0.016 |
| Kano | Decision at $\varepsilon,EM2$  | 0.093  | 0.019 |
| Kano | Decision at $\varepsilon,CT1$  | 0.096  | 0.019 |
| Kano | Decision at $\varepsilon,EM3$  | 0.166  | 0.025 |
| Kano | Decision at $\varepsilon,EM2$  | 0.198  | 0.021 |
| Kano | Decision at $\varepsilon,EM1$  | 0.179  | 0.021 |
| Kano | Decision at $vEM3$             | 0.139  | 0.032 |
| Kano | Decision at $\beta EM,2,1$     | 0.509  | 0.054 |
| Kano | Decision at $\lambda EM,2,1$   | -0.046 | 0.028 |
| Kano | Decision at $\lambda EM,2,1$   | 0.07   | 0.034 |
| Kano | Decision at $vEM2$             | 0.06   | 0.023 |
| Kano | Decision at $\beta EM,1,0$     | 0.489  | 0.075 |
| Kano | Decision at $\lambda EM,1,0$   | 0.021  | 0.03  |
| Kano | Decision at $vCT1$             | -0.203 | 0.094 |
| Kano | Decision at $\theta CT,age$    | 0      | 0.003 |

|      |                                  |        |       |
|------|----------------------------------|--------|-------|
| Kano | Decision at $\theta_{CT,marria}$ | 0.152  | 0.054 |
| Kano | Decision at $\theta_{CT,highes}$ | 0.064  | 0.023 |
| Kano | Decision at $\theta_{CT,births}$ | 0.017  | 0.006 |
| Kano | Decision at $\theta_{CT,urban}$  | 0.15   | 0.047 |
| Kano | Decision at $v_{EM3}$            | 0.289  | 0.059 |
| Kano | Decision at $\lambda_{EM,2,1}$   | 0.077  | 0.047 |
| Kano | Decision at $\beta_{EM,2,1}$     | 0.444  | 0.061 |
| Kano | Decision at $\lambda_{EM,2,1}$   | 0.125  | 0.087 |
| Kano | Decision at $v_{EM2}$            | 0.358  | 0.054 |
| Kano | Decision at $\lambda_{EM,1,0}$   | 0.148  | 0.041 |
| Kano | Decision at $\beta_{EM,1,0}$     | 0.381  | 0.075 |
| Kano | Decision at $v_{EM1}$            | -0.482 | 0.159 |
| Kano | Decision at $\theta_{EM,age}$    | 0.01   | 0.003 |
| Kano | Decision at $\theta_{EM,marria}$ | 0.445  | 0.149 |
| Kano | Decision at $\theta_{EM,highes}$ | 0.134  | 0.045 |
| Kano | Decision at $\theta_{EM,births}$ | 0.03   | 0.007 |
| Kano | Decision at $\theta_{EM,urban}$  | 0.104  | 0.12  |
| Kano | Decision at $cov,CT3,EM$         | 0.006  | 0.008 |
| Kano | Decision at $cov,CT2,EM$         | 0.007  | 0.007 |
| Kano | Decision at $cov,CT1,EM$         | 0.014  | 0.006 |
| Kano | Decision at $\varepsilon,EM3$    | 0.136  | 0.014 |
| Kano | Decision at $\varepsilon,EM2$    | 0.085  | 0.017 |
| Kano | Decision at $\varepsilon,CT1$    | 0.09   | 0.017 |
| Kano | Decision at $\varepsilon,EM3$    | 0.19   | 0.015 |
| Kano | Decision at $\varepsilon,EM2$    | 0.205  | 0.015 |
| Kano | Decision at $\varepsilon,EM1$    | 0.196  | 0.011 |
| Kano | Decision at $v_{EM3}$            | 0.141  | 0.031 |
| Kano | Decision at $\beta_{EM,2,1}$     | 0.49   | 0.054 |
| Kano | Decision at $\lambda_{EM,2,1}$   | 0.039  | 0.055 |
| Kano | Decision at $\lambda_{EM,2,1}$   | 0.065  | 0.049 |
| Kano | Decision at $v_{EM2}$            | 0.059  | 0.02  |
| Kano | Decision at $\beta_{EM,1,0}$     | 0.473  | 0.074 |
| Kano | Decision at $\lambda_{EM,1,0}$   | 0.096  | 0.028 |
| Kano | Decision at $v_{CT1}$            | 0.571  | 0.428 |
| Kano | Decision at $\theta_{CT,age}$    | -0.001 | 0.002 |
| Kano | Decision at $\theta_{CT,marria}$ | -0.594 | 0.437 |
| Kano | Decision at $\theta_{CT,highes}$ | 0.061  | 0.024 |
| Kano | Decision at $\theta_{CT,births}$ | 0.017  | 0.006 |
| Kano | Decision at $\theta_{CT,urban}$  | 0.164  | 0.05  |
| Kano | Decision at $v_{EM3}$            | 0.154  | 0.049 |
| Kano | Decision at $\lambda_{EM,2,1}$   | 0.039  | 0.071 |
| Kano | Decision at $\beta_{EM,2,1}$     | 0.309  | 0.072 |
| Kano | Decision at $\lambda_{EM,2,1}$   | -0.029 | 0.069 |
| Kano | Decision at $v_{EM2}$            | 0.124  | 0.042 |



|      |                                    |        |       |
|------|------------------------------------|--------|-------|
| Kano | Decision at $\lambda_{EM,1,0}$     | 0.07   | 0.046 |
| Kano | Decision at $\beta_{EM,1,0}$       | 0.13   | 0.043 |
| Kano | Decision at $v_{EM1}$              | 0.454  | 0.249 |
| Kano | Decision at $\theta_{EM,age}$      | -0.001 | 0.003 |
| Kano | Decision at $\theta_{EM,marriage}$ | -0.357 | 0.276 |
| Kano | Decision at $\theta_{EM,highest}$  | 0.131  | 0.044 |
| Kano | Decision at $\theta_{EM,births}$   | 0.01   | 0.01  |
| Kano | Decision at $\theta_{EM,urban}$    | -0.063 | 0.081 |
| Kano | Decision at $cov,CT3,EM$           | 0.006  | 0.009 |
| Kano | Decision at $cov,CT2,EM$           | 0.001  | 0.006 |
| Kano | Decision at $cov,CT1,EM$           | 0.006  | 0.004 |
| Kano | Decision at $\varepsilon,EM3$      | 0.144  | 0.017 |
| Kano | Decision at $\varepsilon,EM2$      | 0.089  | 0.018 |
| Kano | Decision at $\varepsilon,CT1$      | 0.094  | 0.019 |
| Kano | Decision at $\varepsilon,EM3$      | 0.15   | 0.029 |
| Kano | Decision at $\varepsilon,EM2$      | 0.128  | 0.03  |
| Kano | Decision at $\varepsilon,EM1$      | 0.132  | 0.019 |
| Kano | Decision at $v_{EM3}$              | 0.091  | 0.031 |
| Kano | Decision at $\beta_{EM,2,1}$       | 0.501  | 0.055 |
| Kano | Decision at $\lambda_{EM,2,1}$     | 0.074  | 0.037 |
| Kano | Decision at $\lambda_{EM,2,1}$     | 0.011  | 0.03  |
| Kano | Decision at $v_{EM2}$              | 0.041  | 0.024 |
| Kano | Decision at $\beta_{EM,1,0}$       | 0.46   | 0.066 |
| Kano | Decision at $\lambda_{EM,1,0}$     | 0.048  | 0.029 |
| Kano | Decision at $v_{CT1}$              | -0.159 | 0.074 |
| Kano | Decision at $\theta_{CT,age}$      | 0      | 0.002 |
| Kano | Decision at $\theta_{CT,marriage}$ | 0.128  | 0.036 |
| Kano | Decision at $\theta_{CT,highest}$  | 0.059  | 0.022 |
| Kano | Decision at $\theta_{CT,births}$   | 0.017  | 0.006 |
| Kano | Decision at $\theta_{CT,urban}$    | 0.124  | 0.049 |
| Kano | Decision at $v_{EM3}$              | 0.342  | 0.074 |
| Kano | Decision at $\lambda_{EM,2,1}$     | 0.031  | 0.042 |
| Kano | Decision at $\beta_{EM,2,1}$       | 0.465  | 0.086 |
| Kano | Decision at $\lambda_{EM,2,1}$     | 0.037  | 0.075 |
| Kano | Decision at $v_{EM2}$              | 0.36   | 0.075 |
| Kano | Decision at $\lambda_{EM,1,0}$     | 0.086  | 0.068 |
| Kano | Decision at $\beta_{EM,1,0}$       | 0.378  | 0.063 |
| Kano | Decision at $v_{EM1}$              | 0.528  | 0.151 |
| Kano | Decision at $\theta_{EM,age}$      | 0      | 0.004 |
| Kano | Decision at $\theta_{EM,marriage}$ | -0.153 | 0.06  |
| Kano | Decision at $\theta_{EM,highest}$  | 0.104  | 0.043 |
| Kano | Decision at $\theta_{EM,births}$   | 0.015  | 0.01  |
| Kano | Decision at $\theta_{EM,urban}$    | -0.232 | 0.116 |
| Kano | Decision at $cov,CT3,EM$           | 0.017  | 0.009 |

|      |                                |        |       |
|------|--------------------------------|--------|-------|
| Kano | Decision at cov,CT2,EM         | 0.014  | 0.006 |
| Kano | Decision at cov,CT1,EM         | 0.016  | 0.007 |
| Kano | Decision at $\varepsilon$ ,EM3 | 0.127  | 0.017 |
| Kano | Decision at $\varepsilon$ ,EM2 | 0.077  | 0.015 |
| Kano | Decision at $\varepsilon$ ,CT1 | 0.081  | 0.016 |
| Kano | Decision at $\varepsilon$ ,EM3 | 0.184  | 0.022 |
| Kano | Decision at $\varepsilon$ ,EM2 | 0.211  | 0.012 |
| Kano | Decision at $\varepsilon$ ,EM1 | 0.233  | 0.009 |
| Kano | Decision at $\nu$ EM3          | 0.092  | 0.032 |
| Kano | Decision at $\beta$ EM,2,1     | 0.492  | 0.058 |
| Kano | Decision at $\lambda$ EM,2,1   | 0.11   | 0.029 |
| Kano | Decision at $\lambda$ EM,2,1   | -0.025 | 0.038 |
| Kano | Decision at $\nu$ EM2          | 0.029  | 0.021 |
| Kano | Decision at $\beta$ EM,1,0     | 0.462  | 0.067 |
| Kano | Decision at $\lambda$ EM,1,0   | 0.07   | 0.025 |
| Kano | Decision at $\nu$ CT1          | -0.172 | 0.079 |
| Kano | Decision at $\theta$ CT,age    | 0      | 0.002 |
| Kano | Decision at $\theta$ CT,marria | 0.129  | 0.037 |
| Kano | Decision at $\theta$ CT,highes | 0.061  | 0.023 |
| Kano | Decision at $\theta$ CT,births | 0.015  | 0.006 |
| Kano | Decision at $\theta$ CT,urban  | 0.133  | 0.049 |
| Kano | Decision at $\nu$ EM3          | 0.356  | 0.062 |
| Kano | Decision at $\lambda$ EM,2,1   | 0.099  | 0.046 |
| Kano | Decision at $\beta$ EM,2,1     | 0.353  | 0.065 |
| Kano | Decision at $\lambda$ EM,2,1   | 0.107  | 0.074 |
| Kano | Decision at $\nu$ EM2          | 0.367  | 0.055 |
| Kano | Decision at $\lambda$ EM,1,0   | 0.138  | 0.068 |
| Kano | Decision at $\beta$ EM,1,0     | 0.311  | 0.065 |
| Kano | Decision at $\nu$ EM1          | 0.578  | 0.139 |
| Kano | Decision at $\theta$ EM,age    | -0.003 | 0.004 |
| Kano | Decision at $\theta$ EM,marria | -0.142 | 0.069 |
| Kano | Decision at $\theta$ EM,highes | 0.091  | 0.044 |
| Kano | Decision at $\theta$ EM,births | 0.012  | 0.01  |
| Kano | Decision at $\theta$ EM,urban  | 0.025  | 0.129 |
| Kano | Decision at cov,CT3,EM         | 0.013  | 0.007 |
| Kano | Decision at cov,CT2,EM         | 0.019  | 0.004 |
| Kano | Decision at cov,CT1,EM         | 0.017  | 0.009 |
| Kano | Decision at $\varepsilon$ ,EM3 | 0.126  | 0.016 |
| Kano | Decision at $\varepsilon$ ,EM2 | 0.076  | 0.015 |
| Kano | Decision at $\varepsilon$ ,CT1 | 0.081  | 0.017 |
| Kano | Decision at $\varepsilon$ ,EM3 | 0.208  | 0.017 |
| Kano | Decision at $\varepsilon$ ,EM2 | 0.221  | 0.011 |
| Kano | Decision at $\varepsilon$ ,EM1 | 0.236  | 0.008 |
